# Supplementary material for: Fascin actin-bundling protein 1 regulates non-small cell lung cancer progression by influencing the transcription and splicing of tumorigenesis-related genes
Source: PeerJ journal article supplement (doi:10.7717/peerj.16526), 2023-12-05

A

## Disease-free survival

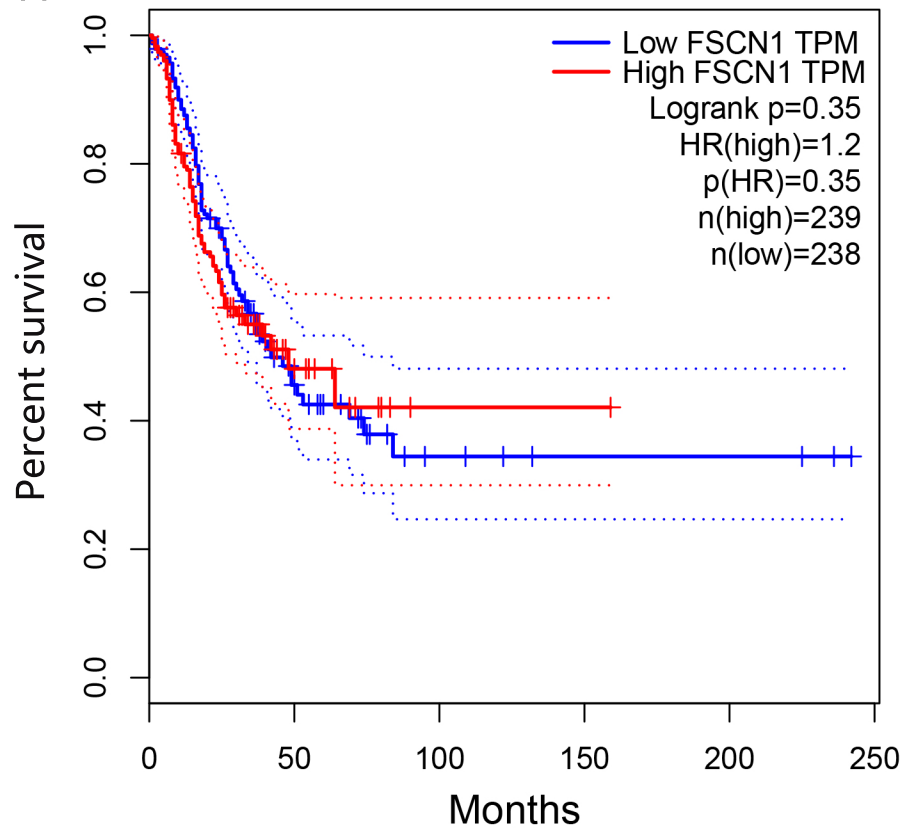

B

## Disease-free survival

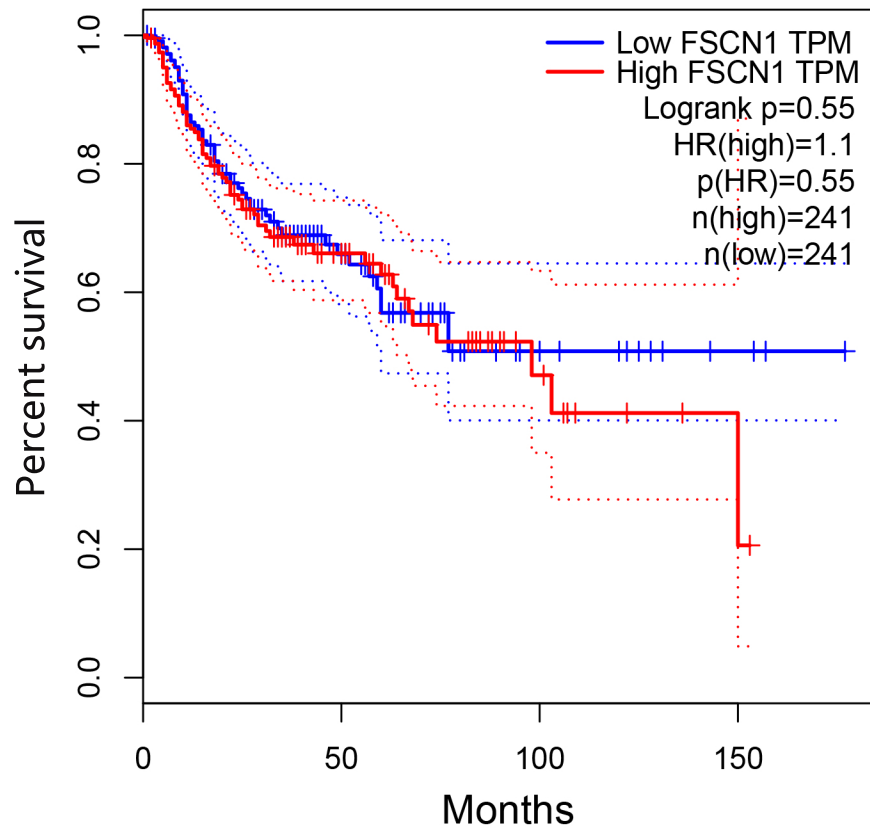

Supplement: Fig_S2.pdf [file Fig_S2.pdf]
